# Supplementary material for: Are We Together in This? Factors associated with men's involvement in maternal health—Insights from the Kenya Demographic and Health Survey
Source: Research Square preprint supplement (doi:10.21203/rs.3.rs-7095806/v1), 2025-09-17
Supplement: Supplementary file 1 [file 1018f1bb5f496a079f01f747.docx]

# Supplementary Materials


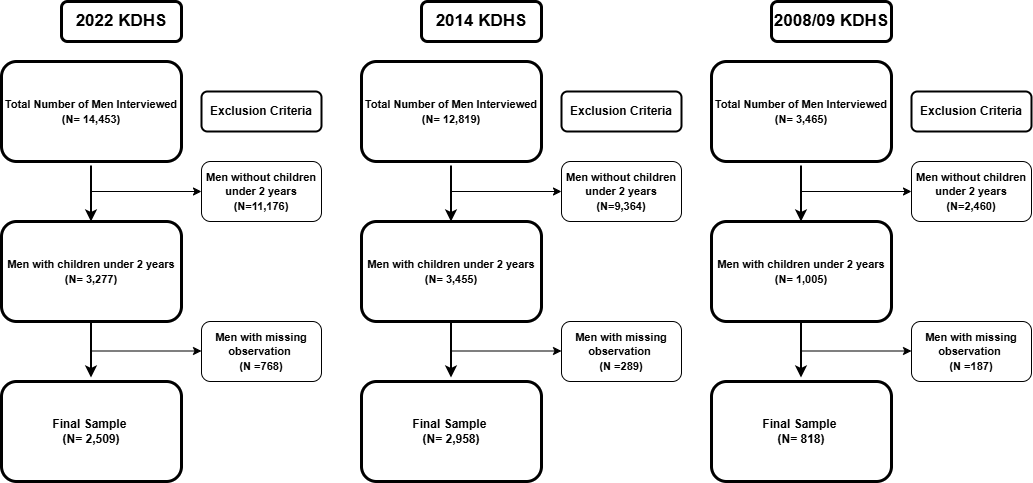


#### Supplementary Fig. 1: Sample size flow chart

#### Supplementary Table 1: Variance inflation factor

| **Variable** | **VIF** | **1/VIF** |
| --- | --- | --- |
| Wealth Index | 2.463 | 0.406 |
| Children No | 2.445 | 0.409 |
| Cohabitation Years | 2.298 | 0.435 |
| Education Level | 1.818 | 0.55 |
| Residence | 1.812 | 0.552 |
| Wife Age | 1.775 | 0.563 |
| Media Exposure Level | 1.463 | 0.683 |
| Household Size | 1.412 | 0.708 |
| Ethnicity | 1.248 | 0.801 |
| Occupation | 1.179 | 0.848 |
| Religion | 1.156 | 0.865 |
| Number of Wives | 1.147 | 0.872 |
| Age | 1.074 | 0.931 |
| Region | 1.06 | 0.943 |
| **Mean VIF** | **1.596** | **.** |

#### Supplementary Table 2: Model postestimation tests- Goodness-of-fit test after logistic model

| **Var** | **Statistics** |
| --- | --- |
| **Number of observations** | 2,958 |
| **Number of covariate patterns** | 2,750 |
| **Pearson chi2** | 2737.56 |
| **p value** | 0.279 |
